# Supplementary material for: Better Communication for Better Management of Persons with Hemophilia: Results from a Patients’-Clinicians’ Project to Address the New Therapeutic Landscape
Source: MDPI journal article supplement (doi:10.3390/jcm13020568), 2024-01-19
Supplement: s1 [file s1]

## Supplementary Materials – S2 – CONTRIBUTORS

Chiara Ambaglio, ASST Giovanni XXIII, Bergamo  
Erminia Baldacci, Policlinico Umberto I, Roma  
Maria Basso, Gemelli, Roma  
Elisa Bertoni, ASST Spedali Civili, Brescia  
Chiara Biasoli, Ospedale M. Bufalini, Cesena  
Alessandra Borchellini, AOU Città scienza e Salute, Torino  
Isabella Cantori, Ospedale di Macerata, Macerata  
Giuseppe Carli, ULSS 8 Berica, Vicenza  
Giancarlo Castaman, AOU Careggi, Firenze  
Alberto Catalano, Policlinico SS Annunziata, Chieti  
Dorina Cultrera, AOU Vittorio Emanuele, Catania  
Grazia Delios, SIMT ASL TO4, Ivrea  
Patrizia Di Gregorio, Policlinico SS Annunziata, Chieti  
Dario Di Minno, Federico II, Napoli  
Paola Giordano, Ospedale pediatrico Giovanni XXIII, Bari  
Anna Chiara Giuffrida, Ospedale Borgo Roma, Verona  
Gaetano Giuffrida, AOU Vittorio Emanuele, Catania  
Chiara Gorio, ASST Spedali Civili, Brescia  
Elvira Grandone, Casa Sollievo Sofferenza, S. Giovanni Rotondo  
Giuseppe Lassandro, Ospedale pediatrico Giovanni XXIII, Bari  
Matteo Luciani, Ospedale Pediatrico Bambin Gesù, Roma  
Renato Marino, Policlinico, Bari  
Tiziano Martini, Ospedale M. Bufalini, Cesena  
Angelo Claudio Molinari, IRCCS Giannina Gaslini, Genova  
Mariasanta Napolitano, Policlinico Giaccone, Palermo  
Paola Pedrazzi, Ospedale M. Bufalini, Cesena  
Lydia Piscitelli, S. Orsola Malpighi, Bologna  
Berardino Pollio, Regina Margherita, Torino  
Stefania Preti, Policlinico S. Matteo, Pavia  
Paolo Radossi, Ospedale S. Giacomo, Castelfranco Veneto  
Vincenza Rossi, Ospedale Annunziata, Cosenza  
Mariaconcetta Russo, Policlinico S. Matteo, Pavia  
Cristina Santoro, Policlinico Umberto I, Roma  
Rita Santoro, AO Pugliese-Ciaccio, Catanzaro  
Michele Schiavulli, AORN Santobono (pediatrico), Napoli  
Chiara Simion, AOU di Padova, Padova  
Sergio Siragusa, Policlinico Giaccone, Palermo  
Gianluca Sottilotta, Malacrino Bianchi Morelli, Reggio Calabria  
Federica Valeri, AOU Città Scienza e Salute, Torino  
Ezio Zanon, AOU di Padova, Padova
